# Supplementary material for: Grape-Seed Procyanidin Extract (GSPE) Seasonal-Dependent Modulation of Glucose and Lipid Metabolism in the Liver of Healthy F344 Rats
Source: MDPI journal article supplement (doi:10.3390/biom12060839), 2022-06-17
Supplement: s1 [file s1]

**Table S1.** Treatment comparison between metabolites related to hepatic glucose metabolism. Metabolites of glucose metabolism in the liver of Fischer 344 rats fed a STD diet and exposed to three different photoperiods for 9 weeks, supplemented with vehicle or GSPE for the last 4 weeks. The statistically significant p-values ( $p < 0.05$ ) are highlighted in bold.

| Metabolites          | L12          |               |              |     | L18           |               |              |     | L6            |               |         |     |
|----------------------|--------------|---------------|--------------|-----|---------------|---------------|--------------|-----|---------------|---------------|---------|-----|
|                      | STD-VH       | STD-GSPE      | p-value      | FC  | STD-VH        | STD-GSPE      | p-value      | FC  | STD-VH        | STD-GSPE      | p-value | FC  |
| Pyruvic acid         | 0.62 ± 0.05  | 0.55 ± 0.07   | 0.424        | 0.9 | 0.87 ± 0.19   | 0.56 ± 0.05   | 0.144        | 0.6 | 0.68 ± 0.09   | 0.62 ± 0.07   | 0.661   | 0.9 |
| Lactic acid          | 20.07 ± 0.74 | 20.01 ± 0.89  | 0.957        | 1   | 20.66 ± 1.78  | 20.34 ± 0.7   | 0.871        | 1   | 21.52 ± 1.21  | 19.21 ± 0.86  | 0.141   | 0.9 |
| Glycerol             | 0.08 ± 0.01  | 0.07 ± 0.01   | 0.407        | 0.8 | 0.07 ± 0.01   | 0.06 ± 0      | 0.218        | 0.8 | 0.08 ± 0.01   | 0.07 ± 0.01   | 0.568   | 0.9 |
| Glycerol-1-phosphate | 1.6 ± 0.09   | 1.51 ± 0.08   | 0.421        | 0.9 | 1.53 ± 0.09   | 1.62 ± 0.09   | 0.492        | 1.1 | 1.69 ± 0.12   | 1.56 ± 0.1    | 0.404   | 0.9 |
| d-Glucose            | 150.4 ± 2.92 | 150.72 ± 2.33 | 0.933        | 1   | 156.07 ± 2.94 | 147.73 ± 1.19 | <b>0.027</b> | 0.9 | 154.73 ± 4.04 | 151.43 ± 2.78 | 0.511   | 1   |
| d-Ribose             | 0.02 ± 0     | 0.01 ± 0      | 0.582        | 0.9 | 0.05 ± 0.02   | 0.01 ± 0      | <b>0.027</b> | 0.2 | 0.02 ± 0      | 0.01 ± 0      | 0.187   | 0.7 |
| Ribose-5-phosphate   | 0.62 ± 0.05  | 0.55 ± 0.07   | 0.424        | 0.9 | 0.87 ± 0.19   | 0.56 ± 0.05   | 0.144        | 0.6 | 0.68 ± 0.09   | 0.62 ± 0.07   | 0.661   | 0.9 |
| Fructose-6-phosphate | 0.03 ± 0     | 0.02 ± 0      | <b>0.018</b> | 0.6 | 0.03 ± 0.01   | 0.04 ± 0.01   | 0.37         | 1.3 | 0.03 ± 0      | 0.03 ± 0      | 0.418   | 1.2 |
| Glucose-6-phosphate  | 0.08 ± 0.01  | 0.05 ± 0.01   | <b>0.033</b> | 0.6 | 0.07 ± 0.01   | 0.09 ± 0.01   | 0.318        | 1.3 | 0.06 ± 0.01   | 0.08 ± 0.01   | 0.44    | 1.2 |

**Table S2.** Photoperiod comparison between metabolites related to hepatic glucose metabolism. Metabolites of glucose metabolism in the liver of Fischer 344 rats fed a STD diet and exposed to three different photoperiods for 9 weeks, supplemented with vehicle or GSPE for the last 4 weeks. The statistically significant p-values ( $p < 0.05$ ) are highlighted in bold.

| Metabolites          | L12-VH vs. L18-VH |     | L12- VH vs. L6-VH |     | L18-VH vs. L6-VH |     | L12-GSPE vs. L18-GSPE |     | L12-GSPE vs. L6-GSPE |     | L18-GSPE vs. L6-GSPE |     |
|----------------------|-------------------|-----|-------------------|-----|------------------|-----|-----------------------|-----|----------------------|-----|----------------------|-----|
|                      | p-value           | FC  | p-value           | FC  | p-value          | FC  | p-value               | FC  | p-value              | FC  | p-value              | FC  |
| Pyruvic acid         | 0.241             | 1.4 | 0.639             | 1.1 | 0.381            | 0.8 | 0.931                 | 1   | 0.472                | 1.1 | 0.47                 | 1.1 |
| Lactic acid          | 0.766             | 1   | 0.323             | 1.1 | 0.692            | 1   | 0.775                 | 1   | 0.527                | 1   | 0.325                | 0.9 |
| Glycerol             | 0.564             | 0.9 | 0.876             | 1   | 0.652            | 1.1 | 0.469                 | 0.9 | 0.899                | 1   | 0.417                | 1.2 |
| Glycerol-1-phosphate | 0.576             | 1   | 0.549             | 1.1 | 0.298            | 1.1 | 0.356                 | 1.1 | 0.664                | 1   | 0.655                | 1   |
| d-Glucose            | 0.193             | 1   | 0.399             | 1   | 0.793            | 1   | 0.295                 | 1   | 0.848                | 1   | 0.267                | 1   |
| d-Ribose             | <b>0.043</b>      | 3.1 | 0.308             | 1.4 | 0.102            | 0.4 | 0.159                 | 0.7 | 0.947                | 1   | 0.12                 | 1.5 |
| Ribose-5-phosphate   | 0.241             | 1.4 | 0.639             | 1.1 | 0.381            | 0.8 | 0.931                 | 1   | 0.472                | 1.1 | 0.47                 | 1.1 |
| Fructose-6-phosphate | 0.411             | 0.8 | 0.266             | 0.8 | 0.87             | 1   | <b>0.038</b>          | 1.7 | 0.055                | 1.5 | 0.661                | 0.9 |
| Glucose-6-phosphate  | 0.432             | 0.8 | 0.269             | 0.8 | 0.791            | 0.9 | 0.043                 | 1.7 | 0.095                | 1.5 | 0.506                | 0.9 |

**Table S3:** Summary of the main metabolic changes due to the GSPE treatment in each photoperiod compared to its respective VH control.

| pathway/treatment | GSPE L12 | GSPE L18  | GSPE L6   |
|-------------------|----------|-----------|-----------|
| GLUCONEOGENESIS   | equal    | equal     | increased |
| GLUCOLISIS        | equal    | increased | equal     |
| LIPOLISIS         | equal    | equal     | equal     |
| LIPOGENESIS       | equal    | decreased | equal     |

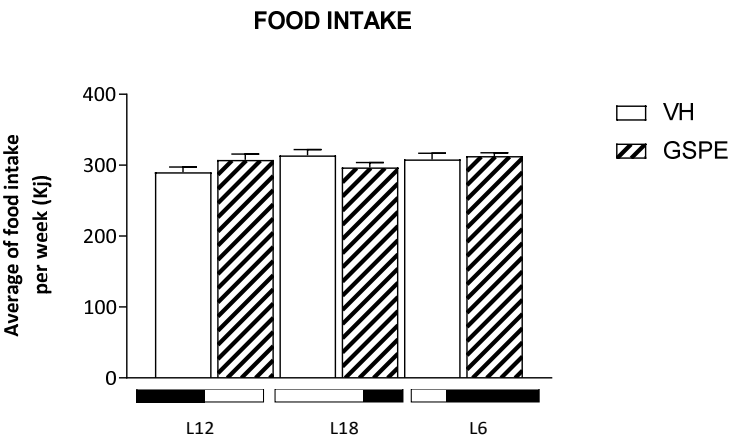

**Figure S1:** Average of weekly food intake (kJ) of different photoperiods
